# Supplementary material for: Spatz: the time-of-flight neutron reflectometer with vertical sample geometry at the OPAL research reactor
Source: PubMed Central journal article supplement (PMC9901927; doi:10.1107/s160057672201086x), 2023-02-01
Supplement: j-56-00018-sup1.pdf [file j-56-00018-sup1.pdf]

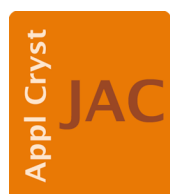

JOURNAL OF  
APPLIED  
CRYSTALLOGRAPHY

**Volume 56 (2023)**

**Supporting information for article:**

**Spatz: the time-of-flight neutron reflectometer with vertical sample geometry at the OPAL research reactor**

**Anton Le Brun, Tzu-Yen Huang, Stewart Pullen, Andrew Nelson, James Spedding and Stephen Holt**

The raw data files, code for data reduction, and model files for data fitting can be found at <https://doi.org/10.5281/zenodo.6829895>. This supporting information provides information on what the files are and how to use them.

### S1. Data file descriptions

The raw data files are included with the manuscript. Supplementary Table S1 below provides a description for each NeXus data file (SPZ000XXXX.nx.hdf) which can be reduced to produce the final reflectivity as shown in the manuscript. Instructions for data reduction are described in section S2 of the supporting information.

**Table S1** Description of each NeXus data file used in this work.

| File number | Description                                                                                    | Angle of incidence |
|-------------|------------------------------------------------------------------------------------------------|--------------------|
| SPZ0000745  | Bragg mirror at $\Delta\lambda/\lambda \sim 1\%$                                               | 0.9°               |
| SPZ0000746  | Bragg mirror at $\Delta\lambda/\lambda \sim 1\%$                                               | 4.8°               |
| SPZ0000747  | Direct beam measurement for Bragg mirror at $\Delta\lambda/\lambda \sim 1\%$ at 0.9° settings  | n/a                |
| SPZ0000748  | Direct beam measurement for Bragg mirror at $\Delta\lambda/\lambda \sim 1\%$ at 4.8° settings  | n/a                |
| SPZ0000610  | Bragg mirror at $\Delta\lambda/\lambda \sim 5\%$                                               | 1.0°               |
| SPZ0000611  | Bragg mirror at $\Delta\lambda/\lambda \sim 5\%$                                               | 4.0°               |
| SPZ0000612  | Direct beam measurement for Bragg mirror at $\Delta\lambda/\lambda \sim 5\%$ at 1.0° settings  | n/a                |
| SPZ0000613  | Direct beam measurement for Bragg mirror at $\Delta\lambda/\lambda \sim 5\%$ at 4.0° settings  | n/a                |
| SPZ0000773  | Bragg mirror at $\Delta\lambda/\lambda \sim 12\%$                                              | 0.9°               |
| SPZ0000774  | Bragg mirror at $\Delta\lambda/\lambda \sim 12\%$                                              | 3.8°               |
| SPZ0000775  | Direct beam measurement for Bragg mirror at $\Delta\lambda/\lambda \sim 12\%$ at 0.9° settings | n/a                |

|            |                                                                                                |       |
|------------|------------------------------------------------------------------------------------------------|-------|
| SPZ0000776 | Direct beam measurement for Bragg mirror at $\Delta\lambda/\lambda \sim 12\%$ at 3.8° settings | n/a   |
| SPZ0000526 | Silicon wafer                                                                                  | 0.6°  |
| SPZ0000527 | Silicon wafer                                                                                  | 1.7°  |
| SPZ0000528 | Silicon wafer                                                                                  | 4.0°  |
| SPZ0000529 | Direct beam measurement for silicon wafer at 0.6° settings                                     | n/a   |
| SPZ0000530 | Direct beam measurement for silicon wafer at 1.7° settings                                     | n/a   |
| SPZ0000531 | Direct beam measurement for silicon wafer at 4.0° settings                                     | n/a   |
| SPZ0000581 | Quartz wafer                                                                                   | 0.9°  |
| SPZ0000582 | Quartz wafer                                                                                   | 4.0°  |
| SPZ0000591 | Sapphire wafer                                                                                 | 0.9°  |
| SPZ0000592 | Sapphire wafer                                                                                 | 4.0°  |
| SPZ0000593 | Direct beam measurement for quartz and sapphire wafers at 0.9° settings                        | n/a   |
| SPZ0000594 | Direct beam measurement for quartz and sapphire wafers at 4.0° settings                        | n/a   |
| SPZ0000675 | D <sub>8</sub> -polystyrene in air on silicon                                                  | 0.6°  |
| SPZ0000676 | D <sub>8</sub> -polystyrene in air on silicon                                                  | 1.7°  |
| SPZ0000677 | D <sub>8</sub> -polystyrene in air on silicon                                                  | 4.0°  |
| SPZ0000678 | Direct beam measurement for D <sub>8</sub> -polystyrene in air on silicon at 0.6° settings     | n/a   |
| SPZ0000679 | Direct beam measurement for D <sub>8</sub> -polystyrene in air on silicon at 1.7° settings     | n/a   |
| SPZ0000680 | Direct beam measurement for D <sub>8</sub> -polystyrene in air on silicon at 4.0° settings     | n/a   |
| SPZ0000665 | Silicon-D <sub>2</sub> O                                                                       | 0.85° |
| SPZ0000666 | Silicon-D <sub>2</sub> O                                                                       | 4.0°  |
| SPZ0000667 | Silicon-H <sub>2</sub> O                                                                       | 0.85° |
| SPZ0000668 | Silicon-H <sub>2</sub> O                                                                       | 4.0°  |
| SPZ0000658 | Direct beam measurements for silicon-D <sub>2</sub> O/H <sub>2</sub> O at 0.85° settings       | n/a   |
| SPZ0000659 | Direct beam measurements for silicon-D <sub>2</sub> O/H <sub>2</sub> O at 4.0° settings        | n/a   |
| SPZ0003493 | Spin coated h-polystyrene on silicon in D <sub>2</sub> O                                       | 0.85° |

|            |                                                                  |       |
|------------|------------------------------------------------------------------|-------|
| SPZ0003494 | Spin coated h-polystyrene on silicon in D <sub>2</sub> O         | 3.5°  |
| SPZ0003495 | Spin coated h-polystyrene on silicon in CM4                      | 0.5°  |
| SPZ0003496 | Spin coated h-polystyrene on silicon in CM4                      | 0.85° |
| SPZ0003497 | Spin coated h-polystyrene on silicon in CM4                      | 3.5°  |
| SPZ0003498 | Spin coated h-polystyrene on silicon in CMSi                     | 0.85° |
| SPZ0003499 | Spin coated h-polystyrene on silicon in CMSi                     | 3.5°  |
| SPZ0003500 | Spin coated h-polystyrene on silicon in H <sub>2</sub> O         | 0.85° |
| SPZ0003501 | Spin coated h-polystyrene on silicon in H <sub>2</sub> O         | 3.5°  |
| SPZ0003473 | DMPC bilayer on silicon at 37°C in D <sub>2</sub> O              | 0.85° |
| SPZ0003474 | DMPC bilayer on silicon at 37°C in D <sub>2</sub> O              | 3.5°  |
| SPZ0003475 | DMPC bilayer on silicon at 37°C in CM4                           | 0.5°  |
| SPZ0003476 | DMPC bilayer on silicon at 37°C in CM4                           | 0.85° |
| SPZ0003477 | DMPC bilayer on silicon at 37°C in CM4                           | 3.5°  |
| SPZ0003478 | DMPC bilayer on silicon at 37°C in CMSi                          | 0.85° |
| SPZ0003479 | DMPC bilayer on silicon at 37°C in CMSi                          | 3.5°  |
| SPZ0003480 | DMPC bilayer on silicon at 37°C in H <sub>2</sub> O              | 0.85° |
| SPZ0003481 | DMPC bilayer on silicon at 37°C in H <sub>2</sub> O              | 3.5°  |
| SPZ0003470 | Direct beam for h-polystyrene and DMPC bilayer at 0.5° settings  | n/a   |
| SPZ0003471 | Direct beam for h-polystyrene and DMPC bilayer at 0.85° settings | n/a   |
| SPZ0003472 | Direct beam for h-polystyrene and DMPC bilayer at 3.5° settings  | n/a   |

---

## S2. Description of the reduction code

The reduction code is within *refnx* in a Jupyter notebook format within a Conda environment and is called `Spatz_reduction_demo.ipynb`. Instructions and how to set-up the required conda environments and which features are needed can be found at: <https://refnx.readthedocs.io/en/latest/installation.html>. Below is a description of the steps needed to reduce the data once the needed computing environments have been set-up.

The first steps are to import the required modules, define the directory where the data files are, and import the manual beam finder.

```

%matplotlib notebook
%gui qt
import numpy as np
import matplotlib.pyplot as plt
import os.path

from refnx.reduce import SpatzNexus, SpatzReduce, catalogue, reduce_stitch
from refnx.reduce.manual_beam_finder import ManualBeamFinder
import refnx.util.ErrorProp as EP
from refnx.util import q

# data_folder = os.path.join('L:', 'data', 'cycle', 'current', 'sics')
# print(data_folder)

data_folder = './'

mbf = ManualBeamFinder()

```

There is also an option to catalogue the data and list the various settings.

```
catalogue(990, 1003, data_folder=data_folder, prefix='SPZ')
```

Next define which data files are the direct beams (db0, db1, etc.) and the reflected beam data (red0, red1, etc.) files. The final line defines the scale factor to use. Using the manual beam finder will create a pop-up window where the specular peak (foreground) and background regions can be manually defined.

```

db0 = SpatzReduce('SPZ0000977.nx.hdf', data_folder=data_folder)
db1 = SpatzReduce('SPZ0000978.nx.hdf', data_folder=data_folder)
#db2 = SpatzReduce('SPZ0000978.nx.hdf', data_folder=data_folder)

red0, reduction0 = db0.reduce('SPZ0001039.nx.hdf', rebin_percent=3.4, manual_beam_find=mbf, peak_pos=-1)
red1, reduction1 = db1.reduce('SPZ0001041.nx.hdf', rebin_percent=3.4, manual_beam_find=mbf, peak_pos=-1)
#red2, reduction2 = db2.reduce('SPZ0001041.nx.hdf', rebin_percent=3.0, manual_beam_find=mbf, peak_pos=-1)
red0[0].scale(1.05)

```

The data can also be plotted at this point, which is useful to check overlap regions and that the correct scale factor is being used.

```

plt.plot(red0[0].x, red0[0].y)
plt.plot(red1[0].x, red1[0].y)
#plt.plot(red2[0].x, red2[0].y)
plt.yscale('log')
plt.xscale('log')

```

The next steps print out the beam positions, actual angle of incidence, pixel size and sample to detector distance.

```
db0.direct_beam.m_beampos, db1.direct_beam.m_beampos, #db2.direct_beam.m_beampos
```

```
db0.reflected_beam.m_beampos, db1.reflected_beam.m_beampos, #db2.reflected_beam.m_beampos
```

```
reduction0['m_twotheta'][0, 0, 486:488], reduction0['omega'], reduction1['m_twotheta'][0, 0, 486:488], reduction1['omega']
```

```

from refnx.util import q, angle, wavelength
angle(0.0102, 15.7), wavelength(0.01063, 0.65)

```

```
db0.direct_beam.cat.cat['qz_pixel_size'], db0.direct_beam.cat.cat['dy']
```

The data at this point is combined at the overlap region and the combined data can be plotted to ensure that the stitching is satisfactory.

```
combined_dataset = red0[0]
combined_dataset += red1[0]
#combined_dataset += red2[0]
```

```
plt.plot(combined_dataset.x, combined_dataset.y)
plt.yscale('log')
plt.xscale('log')
```

The final step in the reduction is to save the reduced data to file.

```
combined_dataset.save('c_SPZ0001039.dat')
```

However, one can reduce and combine all these files in a single step:

```
reduce_stitch([1039, 1041], [977, 978], prefix='SPZ', data_folder=data_folder, rebin_percent=3.0)
```

### S3. Fitting parameters

Fitting was completed using the *refnx* fitting package (v0.1.18 onwards) originally developed by Nelson and Prescott (2019). The GUI application was used and instructions for use of the GUI can be found here: <https://refnx.readthedocs.io/en/latest/>, which also has links to download the latest version of *refnx*; here we use version 1.18. Supplementary Table S2 below describes the model files used for the fitting which can be loaded into the *refnx* GUI along with the corresponding reduced reflectivity data. The file contains the layers used to describe the system, and the parameters and their associated boundaries for each layer. Data were fitted using a differential evolution routine to minimise  $\chi^2$  values and uncertainties were determined using a MCMC algorithm. Models with multiple isotopic contrasts were co-refined simultaneously with the thickness and roughness constrained to be the same for each contrast.

**Table S2** Description of the model files used for the fitting described in the manuscript.

| File name             | Description                                               |
|-----------------------|-----------------------------------------------------------|
| coef_c_SPZ0000745.pkl | Bragg mirror at $\Delta\lambda/\lambda \sim 1\%$          |
| coef_c_SPZ0000610.pkl | Bragg mirror at $\Delta\lambda/\lambda \sim 5\%$          |
| coef_c_SPZ0000773.pkl | Bragg mirror at $\Delta\lambda/\lambda \sim 12\%$         |
| coef_c_SPZ0000526.pkl | Silicon wafer                                             |
| coef_c_SPZ0000581.pkl | Quartz wafer                                              |
| coef_c_SPZ0000591.pkl | Sapphire wafer                                            |
| coef_c_SPZ0000675.pkl | Spin coated d <sub>8</sub> -polystyrene on silicon in air |
| coef_c_SPZ0000665.pkl | Silicon-D <sub>2</sub> O                                  |
| coef_c_SPZ0000667.pkl | Silicon-H <sub>2</sub> O                                  |

|                       |                                                          |
|-----------------------|----------------------------------------------------------|
| coef_c_SPZ0003493.pkl | Spin coated h-polystyrene on silicon in D <sub>2</sub> O |
| coef_c_SPZ0003495.pkl | Spin coated h-polystyrene on silicon in CM4              |
| coef_c_SPZ0003498.pkl | Spin coated h-polystyrene on silicon in CMSi             |
| coef_c_SPZ0003500.pkl | Spin coated h-polystyrene on silicon in H <sub>2</sub> O |
| coef_c_SPZ0003473.pkl | DMPC bilayer on silicon at 37°C in D <sub>2</sub> O      |
| coef_c_SPZ0003474.pkl | DMPC bilayer on silicon at 37°C in CM4                   |
| coef_c_SPZ0003475.pkl | DMPC bilayer on silicon at 37°C in CMSi                  |
| coef_c_SPZ0003476.pkl | DMPC bilayer on silicon at 37°C in H <sub>2</sub> O      |

---

#### S4. Supporting references

Nelson, A. R. J. & Prescott, S. W. (2019). *Journal of Applied Crystallography* **52**, 193-200.
